# Supplementary material for: Analyzing the Role of Fe0 and Fe3+ in the Formation of Expanded Clay Aggregates
Source: MDPI journal article supplement (doi:10.3390/ma16165623), 2023-08-14
Supplement: s1 [file s1]

**Table S4.** Coefficients of the regression models and analysis of variance obtained for each key property in the H-aggregates.

|                | $BI$<br>(cubic) | $\rho_{rd}$<br>(special<br>cubic) | $\sqrt{WA_{24}}$<br>(special<br>cubic) | $\sqrt{S}$<br>(quadratic) |
|----------------|-----------------|-----------------------------------|----------------------------------------|---------------------------|
| K              | -5.5            | 1.9                               | 3.4                                    | 4.2                       |
| H              | -549.7          | 2.9                               | 7.3                                    | 6.1                       |
| C              | -485251.5       | -232.0                            | -3.0                                   | 420.4                     |
| N              | -12382.6        | -400.5                            | 1431.2                                 | -824.8                    |
| cubic (K,H)    | -714.3          | -                                 | -                                      | -                         |
| cubic (K,C)    | -262661.4       | -                                 | -                                      | -                         |
| cubic (K,N)    | -13944.3        | -                                 | -                                      | -                         |
| cubic (H,C)    | -291698.1       | -                                 | -                                      | -                         |
| cubic (H,N)    | 1241.9          | -                                 | -                                      | -                         |
| cubic (C,N)    | 376049.2        | -                                 | -                                      | -                         |
| K:H            | 1028.6          | 3.1                               | -18.2                                  | -3.2                      |
| K:C            | 747087.1        | 242.0                             | 13.6                                   | -473.0                    |
| K:N            | 25609.1         | 422.4                             | -1497.9                                | 844.8                     |
| H:C            | 773019.2        | 283.4                             | -148.7                                 | -574.2                    |
| H:N            | 13952.7         | 450.8                             | -1644.1                                | 905.1                     |
| C:N            | 660327.3        | 5287.4                            | -6628.9                                | 538.4                     |
| K:H:C          | -546064.2       | -297.6                            | 574.7                                  | -                         |
| K:H:N          | -15435.9        | -61.1                             | 335.0                                  | -                         |
| K:C:N          | -429441.4       | 5171.9                            | 5981.4                                 | -                         |
| H:C:N          | -460743.9       | -4876.0                           | 4373.7                                 | -                         |
| F-statistic    | 14.48           | 182.4                             | 107.5                                  | 111.5                     |
| p-value        | 8.942e-07       | < 2.2e-16                         | < 2.2e-16                              | < 2.2e-16                 |
| R <sup>2</sup> | 0.8822          | 0.986                             | 0.976                                  | 0.9684                    |
