# Supplementary material for: Analyzing the Role of Fe0 and Fe3+ in the Formation of Expanded Clay Aggregates
Source: MDPI journal article supplement (doi:10.3390/ma16165623), 2023-08-14
Supplement: s1 [file s1]

**Table S3.** Coefficients of the regression models and analysis of variance obtained for each key property in the I-aggregates.

|                      | <i>BI</i><br>(cubic) | <i>Log(ρ<sub>rd</sub>)</i><br>(simplified<br>cubic) | <i>WA<sub>24</sub></i><br>(cubic) | <i>Log(S)</i><br>(cubic) |
|----------------------|----------------------|-----------------------------------------------------|-----------------------------------|--------------------------|
| <b>K</b>             | -7.9                 | 0.7                                                 | 11.4                              | 2.6                      |
| <b>I</b>             | -87.3                | 0.2                                                 | -150.1                            | 23.2                     |
| <b>C</b>             | 96379.8              | 380.3                                               | 138878.9                          | -14214.5                 |
| <b>N</b>             | -133450.6            | -311.9                                              | -57065.2                          | 13955.3                  |
| <b>cubic (K,I)</b>   | -135.1               | -                                                   | -242.2                            | 29.7                     |
| <b>cubic (K,C)</b>   | 52874.8              | 132.9                                               | 75596.3                           | -7805.7                  |
| <b>cubic (K,N)</b>   | -75887.4             | -                                                   | -36779.0                          | 7995.6                   |
| <b>cubic (I,C)</b>   | 61193.2              | -                                                   | 78500.0                           | -7564.6                  |
| <b>cubic (I,N)</b>   | -70711.7             | -294.2                                              | -23467.4                          | 7141.8                   |
| <b>cubic (C,N)</b>   | -106160.5            | -                                                   | -133725.6                         | 18771.8                  |
| <b>K:I</b>           | 182.3                | 2.4                                                 | 298.3                             | -44.4                    |
| <b>K:C</b>           | -149079.6            | -521.8                                              | -214113.2                         | 21979.4                  |
| <b>K:N</b>           | 208749.5             | 328.2                                               | 93267.1                           | -21896.0                 |
| <b>I:C</b>           | -157619.5            | -355.2                                              | -216888.5                         | 21720.6                  |
| <b>I:N</b>           | 205263.2             | 597.9                                               | 82269.7                           | -21241.7                 |
| <b>C:N</b>           | 47459.3              | -                                                   | -71774.2                          | -512.3                   |
| <b>K:I:C</b>         | 117270.8             | -                                                   | 155493.2                          | -15384.3                 |
| <b>K:I:N</b>         | -148615.3            | -289.2                                              | -62479.6                          | 15421.8                  |
| <b>K:C:N</b>         | -31595.8             | -                                                   | 24587.0                           | 713.6                    |
| <b>I:C:N</b>         | -22015.0             | -322.0                                              | 33237.1                           | 983.1                    |
| <b>F-statistic</b>   | 32.62                | 377.4                                               | 55.25                             | 208.2                    |
| <b>p-value</b>       | 2.158e-09            | < 2.2e-16                                           | 3.731e-11                         | 1.085e-15                |
| <b>R<sup>2</sup></b> | 0.9461               | 0.9927                                              | 0.9679                            | 0.9914                   |
